# Supplementary material for: Testing the Strength of Hospital Accreditation as a Signal of the Quality of Care in Romania: Do Patients’ and Health Professionals’ Perceptions Align?
Source: PubMed Central journal article supplement (PMC7551154; doi:10.3390/healthcare8030349), 2020-09-19
Supplement: healthcare-08-00349-s001.pdf [file healthcare-08-00349-s001.pdf]

## Supplementary material

**Table S1.** Descriptive statistics – health professionals’ sample.

| Variable                  | Frequency | Variable                 | Frequency |
|---------------------------|-----------|--------------------------|-----------|
| <b>Gender</b>             |           | <b>Hospital type</b>     |           |
| Female                    | 83.7%     | Chronic diseases         | 4.8%      |
| Male                      | 16.3%     | General                  | 54.5%     |
|                           |           | Specialty                | 20.7%     |
|                           |           | Emergency                | 19.1%     |
| <b>Job position</b>       |           | <b>Hospital coverage</b> |           |
| Medical doctor            | 26.2%     | Local                    | 67.6%     |
| Nurse                     | 73.8%     | County - level           | 16.8%     |
|                           |           | Regional                 | 11.8%     |
|                           |           | Unspecified              | 1.3%      |
| <b>Hospital ownership</b> |           | <b>Hospital rank*</b>    |           |
| Public                    | 91.3%     | I                        | 3.4%      |
| Private                   | 7.7%      | I M                      | 3.8%      |
|                           |           | II                       | 5.7%      |
|                           |           | II M                     | 6.2%      |
|                           |           | III                      | 12.1%     |
|                           |           | IV                       | 49.9%     |
|                           |           | V                        | 14.9%     |
|                           |           | Unclassified             | 3.1%      |

\* Hospital rank according to the “Order no. 10/2018 regarding the approval of the classes of accreditation of the healthcare units with beds corresponding to the cycle II of accreditation, Official Gazette no. 95 from January 31st, 2018”: I - accredited (a total score of conformity with the Romanian Authority for Quality Assurance in Healthcare henceforth RAQAH standards of at least 90% after the evaluation); II - accredited with recommendations (at least 70% conformity with the standards of the RAQAH); III - accredited with reserves (at least 51% conformity with the standards of the RAQAH); IV - accredited with low trust (at least 51% conformity with the standards of the RAQAH + less than 30% from the parameters scored by (-10) applicable to the respective healthcare unit); V - is made for a period of mostly 6 months from the reception of the accreditation report, during which a decision to extend the process of accreditation is released and needs the fulfillment by the healthcare units with beds of the new criteria and cumulative conditions.

**Table S2.** Descriptive statistics – patients’ sample.

| <b>Variable</b>           | <b>Frequency</b> | <b>Variable</b>                   | <b>Frequency</b> |
|---------------------------|------------------|-----------------------------------|------------------|
|                           |                  | <b>Education</b>                  |                  |
| <b>Gender</b>             |                  | Maximum 10 years                  | 30.5%            |
| Female                    | 58.9%            | High school                       | 27.5%            |
| Male                      | 41.1%            | Vocational school                 | 26.7%            |
|                           |                  | Bachelor                          | 12.8%            |
|                           |                  | Master                            | 2.4%             |
| <b>Civil status</b>       |                  | <b>Occupation Sector</b>          |                  |
| Married                   | 61.9%            | Public                            | 13.5%            |
| Divorced                  | 5.8%             | Private                           | 28.2%            |
| Unmarried                 | 14.0%            | Do not work                       | 58.3%            |
| Consensual union          | 2.1%             |                                   |                  |
| Other                     | 15.9%            |                                   |                  |
| <b>Social status</b>      |                  | <b>Home place (# inhabitants)</b> |                  |
| Similar to other families | 61.3%            | Village                           | 58.7%            |
| Above average             | 15.0%            | 100-200                           | 7.9%             |
| Among the wealthiest      | 0.8%             | 30-100                            | 8.9%             |
| Among the poorest         | 3.5%             | >200                              | 16.9%            |
| Under average             | 16.0%            | <30                               | 7.5%             |

**Table S3:** Questions in the health professionals' sample

| No. crt. | Question                                                                                                                                                                                                                           | Item                                                                                    | Latent construct                            |
|----------|------------------------------------------------------------------------------------------------------------------------------------------------------------------------------------------------------------------------------------|-----------------------------------------------------------------------------------------|---------------------------------------------|
| 1.       | To what extent do you think that the following effects occurred after accreditation?<br><br>Measurement: 1 – 5; 1 = total disagreement; 5 = Total agreement                                                                        | Increased patients' satisfaction with medical services                                  | "Perceived differences in quality" (PDQ).   |
|          |                                                                                                                                                                                                                                    | Increased quality of administrative services                                            |                                             |
|          |                                                                                                                                                                                                                                    | Increased quality of medical services                                                   |                                             |
|          |                                                                                                                                                                                                                                    | Better hospital reputation                                                              |                                             |
| 2.       | To what extent do you agree that after accreditation the following happened?<br><br>Measurement: 1 – 5; 1 = total disagreement; 5 = Total agreement                                                                                | Better resource allocation to improve the quality of medical care                       | "Actions taken after accreditation" (ATAA). |
|          |                                                                                                                                                                                                                                    | Developing a clear strategy to improve quality                                          |                                             |
|          |                                                                                                                                                                                                                                    | Support to remedy improvable aspects identified during evaluation                       |                                             |
|          |                                                                                                                                                                                                                                    | Support to improve hospital's reputation                                                |                                             |
| 3.       | To what extent the following type of initiatives have been taken to support the employees after hospital accreditation?<br><br>Measurement: 1 – 5; 1 = total disagreement; 5 = Total agreement                                     | Training to identify and implement measures to increase quality                         | "Actions to improve quality" (AIQ)          |
|          |                                                                                                                                                                                                                                    | Ongoing monitoring of patients' feedback regarding the quality of received medical care |                                             |
|          |                                                                                                                                                                                                                                    | Other concrete actions to improve quality of care                                       |                                             |
| 4.       | Do you think that the patients who come for medical services knew whether the hospital was accredited or not?<br><br>Measurement: Yes/No                                                                                           |                                                                                         | Not part of a latent construct              |
| 5.       | To what extent do you believe that the results of the accreditation process will determine patients to:<br><br>Measurement: 1 – 5; 1 = total disagreement; 5 = Total agreement                                                     | (a) choose better ranked hospitals                                                      | Not part of a latent construct              |
|          |                                                                                                                                                                                                                                    | (b) stay with the hospital that they choose;                                            |                                             |
|          |                                                                                                                                                                                                                                    | (c) ask for alternatives                                                                |                                             |
| 6.       | To what extent do you believe that family physicians will use this signal to direct patients towards hospitals able to provide services of a better quality<br><br>Measurement: 1 – 5; 1 = total disagreement; 5 = Total agreement |                                                                                         | Not part of a latent construct              |

**Table S4:** Questions in the patients' sample

| Question                                                                                                                                                                                                                             | Item                                                                                                                                                                                                               | Latent construct                                                  |
|--------------------------------------------------------------------------------------------------------------------------------------------------------------------------------------------------------------------------------------|--------------------------------------------------------------------------------------------------------------------------------------------------------------------------------------------------------------------|-------------------------------------------------------------------|
| <p style="text-align: center;">Are you aware that the Romanian hospitals pursue accreditation?</p> <p style="text-align: center;">Measurement: Yes/No</p>                                                                            |                                                                                                                                                                                                                    | <p style="text-align: center;">Not part of a latent construct</p> |
| <p>To what extent would you pursue one of the following, if you found that the hospital you are sent to does not comply with the accreditation standards?</p> <p>Measurement: 1 – 5; 1 = total disagreement; 5 = Total agreement</p> | <p>(a) ask the family physician or the specialist for another option;</p> <p>(b) look for another option yourself;</p> <p>(c) stay with the option because you trust the health professionals of that hospital</p> | <p style="text-align: center;">Not part of a latent construct</p> |
